# Supplementary material for: CD39/CD73 Dysregulation of Adenosine Metabolism Increases Decidual Natural Killer Cell Cytotoxicity: Implications in Unexplained Recurrent Spontaneous Abortion
Source: PubMed Central journal article supplement (PMC8866181; doi:10.3389/fimmu.2022.813218), 2022-02-10
Supplement: DataSheet_1.pdf [file DataSheet_1.pdf]

## Supplementary Material

**Table S1. Characteristics of the patients and controls**

|                     | Normal    | URSA      |
|---------------------|-----------|-----------|
| Sample size         | 30        | 12        |
| Age                 | 24.3±0.41 | 24.8±0.59 |
| Pregnant weeks      | 7.83±0.19 | 7.60±0.25 |
| Numbers of abortion | 1.3±0.16  | 2.6±0.15  |

Data are presented as mean ± SEM. No significant difference in age and pregnant weeks was observed between the two groups. Comparison of numbers of abortion between the two groups was not conducted.

## Flow cytometry strategy

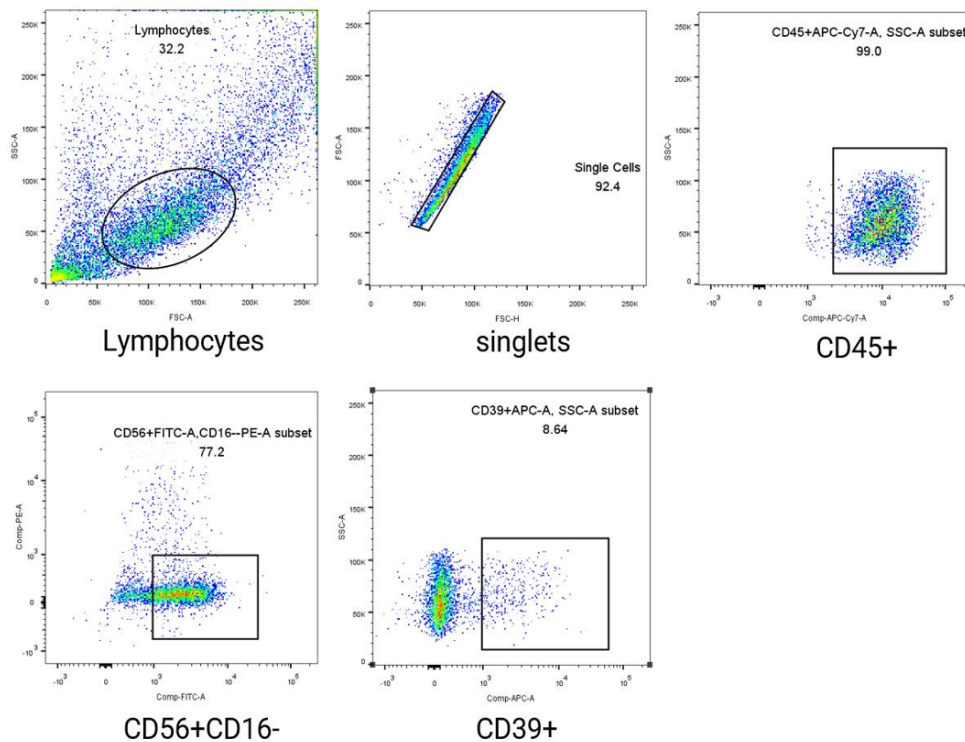

**Figure S1. Gating strategy of the multidimensional flow cytometry analysis.** The representative scatter diagrams show the gating strategy for flow cytometric analysis

of dNK cells from normal decidual tissue. Following singlet events gating (FSC\_A and FSC\_H), viable CD45+ lymphocytes were identified. The CD56+CD16-dNK population and phenotype were examined according to the expression of surface marker CD39+dNK (NKp44, NKp30, NKG2D and CD107a).

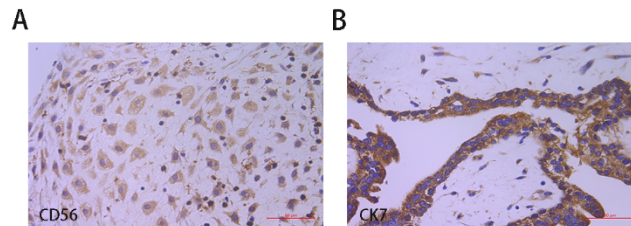

**Figure S2. Immunohistochemical staining of CD56 and CK7 in the decidual and villous tissues.** Representative photographs of CD56 (A) and CK7 (B) immunohistochemical staining in normal decidual and villous tissues, respectively. Scale bar =50  $\mu$ m.

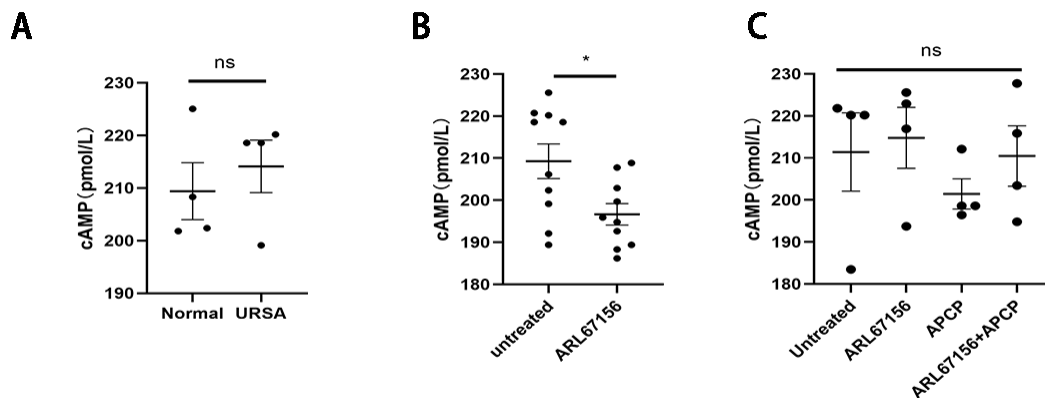

**Figure S3. Production of cAMP in dNK cells.** (A) dNK cells were isolated from decidual tissues of normal pregnant women (n=4) and URSA patients (n=4), and then cultured in a 24-well plate ( $2 \times 10^5$  cells/well) for 24 hours. The concentration of cAMP in the media was measured using ELISA (mean  $\pm$  SEM, two-tailed t test). (B) Freshly

prepared dNK cells (n=10) were isolated from healthy decidua and incubated in the absence or presence of CD39 inhibitor (ARL67156) in a 24-well plate ( $2 \times 10^5$  cells/well) for 24 hours. The concentration of cAMP in the media was measured using ELISA (mean  $\pm$  SEM, \*P < 0.05, two-tailed t test). (C) dNK cells isolated from healthy decidua (n=4) were co-cultured with HTR-8/SVneo cells (dNK cells:HTR-8/SVneo cells = 2:1) and incubated in the absence or presence of the CD39 inhibitor ARL67156 and/or the CD73 inhibitor APCP in a 24-well plate ( $2 \times 10^5$  cells/well) for 24h. The concentration of cAMP in the media was measured using ELISA (mean  $\pm$  SEM, compared with the untreated group, one-way ANOVA and post hoc tests).
